# Supplementary material for: Real-World Data on Chronic Myelomonocytic Leukemia: Clinical and Molecular Characteristics, Treatment, Emerging Drugs, and Patient Outcomes
Source: MDPI journal article supplement (doi:10.3390/cancers14174107), 2022-08-25
Supplement: s1 [file s1]

# Real-world data on chronic myelomonocytic leukemia: clinical and molecular characteristics, treatment, emerging drugs, and patient outcomes

Sandra Castaño-Díez, Mónica López-Guerra, Cristina Bosch-Castañeda, Alex Bataller, Paola Charry, Daniel Esteban, Francesca Guijarro, Carlos Jiménez-Vicente, Carlos Castillo-Girón, Albert Cortes, Alexandra Martínez-Roca, Ana Triguero, José Ramón Álamó, Silvia Beà, Dolors Costa, Dolors Colomer, María Rozman, Jordi Esteve, Marina Díaz-Beyá

## Supplementary Information

**Table S1:** NGS panels used for gene mutation analysis.

**Table S2:** Cytogenetic abnormalities

**Figure S1:** Alluvial plot of the patients included in the study according to CPSS and CPSS-Mol scores.

**Figure S2:** Overall survival according to the number of mutations detected at CMML diagnosis.

**Figure S3:** Overall survival according to the mutational status of transcription factors.

**Table S1:** NGS panels used for gene mutation analysis.

| NGS panel                                                            | Genes and regions studied                                                                                                                                                                                                              |
|----------------------------------------------------------------------|----------------------------------------------------------------------------------------------------------------------------------------------------------------------------------------------------------------------------------------|
| <b>Ion Ampliseq™ AML Research Panel</b><br>(ThermoFisher Scientific) | Coding regions: <i>CEBPA, DNMT3A, GATA2, TET2, TP53</i>                                                                                                                                                                                |
|                                                                      | Hotspot regions: <i>ASXL1, BRAF, CBL, FLT3, IDH1, IDH2, JAK2, KIT, KRAS, NPM1, NRAS, PTPN11, RUNX1, WT1</i>                                                                                                                            |
|                                                                      | Coding regions: <i>ASXL1, BCOR, CALR, CEBPA, ETV6, EZH2, IKZF1, NF1, PHF6, PRPF8, RB1, RUNX1, SH2B3, STAG2, TET2, TP53, ZRSR2</i>                                                                                                      |
| <b>Oncomine™ Myeloid Research Panel</b><br>(ThermoFisher Scientific) | Hotspot regions: <i>ABL1, BRAF, CBL, CSF3R, DNMT3A, FLT3, GATA2, HRAS, IDH1, IDH2, JAK2, KIT, KRAS, MPL, MYD88, NPM1, NRAS, PTPN11, SETBP1, SF3B1, SRSF2, U2AF1, WT1</i>                                                               |
|                                                                      | Genes involved in gene fusions: <i>ABL1, ALK, BCL2, BRAF, CCND1, CREBBP, EGFR, ETV6, FGFR1, FGFR2, FUS, HMGA2, JAK2, KMT2A, MECOM, MET, MLLT10, MLLT3, MYBL1, MYH11, NTRK3, NUP214, PDGFRA, PDGFRB, RARA, RBM15, RUNX1, TCF3, TFE3</i> |

**Table S2:** Cytogenetic abnormalities observed in 50 of 156 CMML patients.

| <b>Karyotype</b>                                     | <b><i>n</i> = 156 <i>n</i> (%)</b> |
|------------------------------------------------------|------------------------------------|
| <b>Normal</b>                                        | 106 (67.9)                         |
| <b>Abnormal</b>                                      | 50 (32.1)                          |
| +8 isolated                                          | 11                                 |
| -7/del(7q) isolated                                  | 7                                  |
| -Y                                                   | 7                                  |
| Complex karyotype                                    | 6                                  |
| Others                                               |                                    |
| 47,XX,+8[5]/48,idem,+21[2]                           | 1                                  |
| 46,XY,t(5;6)(q31;q22);t(12;20)(p13;q11)[20]          | 1                                  |
| 46,XX,del(17)(p12)[20]                               | 1                                  |
| 47,XY,+21[7]/46,XY[20]                               | 1                                  |
| 46,XX,t(5;16)[3]/46,XX[17]                           | 1                                  |
| 46,XY,t(3;7)(q26;q21)[10]/46,XY,idem,+13[4]          | 1                                  |
| 47,XY,+mar[2]/46,XX[30]                              | 1                                  |
| 47,XY,+21[12]/46,XY[8]                               | 1                                  |
| 46,XX,del(11)(q22q24)[14]/46,idem,del(12)(p12p13)[5] | 1                                  |
| 46,XY, t(2;3) (p21;q27)[26]                          | 1                                  |
| 46XY,del(11)(q14.3) [20]                             | 1                                  |
| 46,XX,del(5)(q33)[5]/46,XX[15]                       | 1                                  |
| 46,XY,add(6)(q23)[4]/46 XY[16]                       | 1                                  |
| 46,XX,del-5(q13q33)[18]                              | 1                                  |
| 46,XY,del(12)(p12)[8]/46, XY[12]                     | 1                                  |
| 46,XY,del(20)(q11q13)[7]/46,XY[13]                   | 1                                  |
| 47,XY,+11[12]/46,XY[8]                               | 1                                  |
| 46,XY,t(14;15)(q32;q22)[14]                          | 1                                  |
| 46,XY,del(20)(q11q13)[8]/46,XY[8]                    | 1                                  |

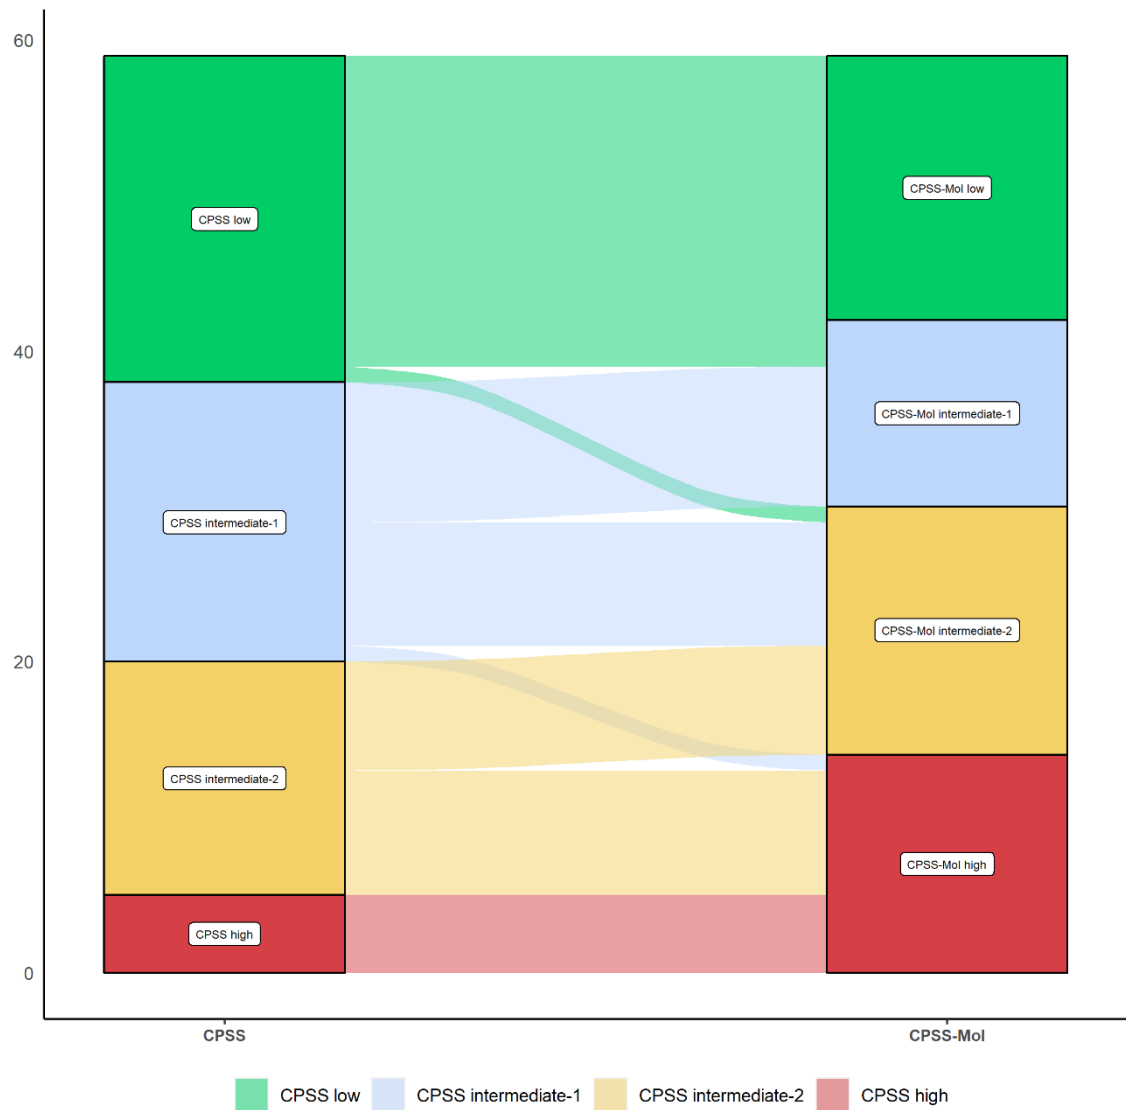

**Figure S1:** Alluvial plot of the patients included in the study according to CPSS and CPSS-Mol scores.

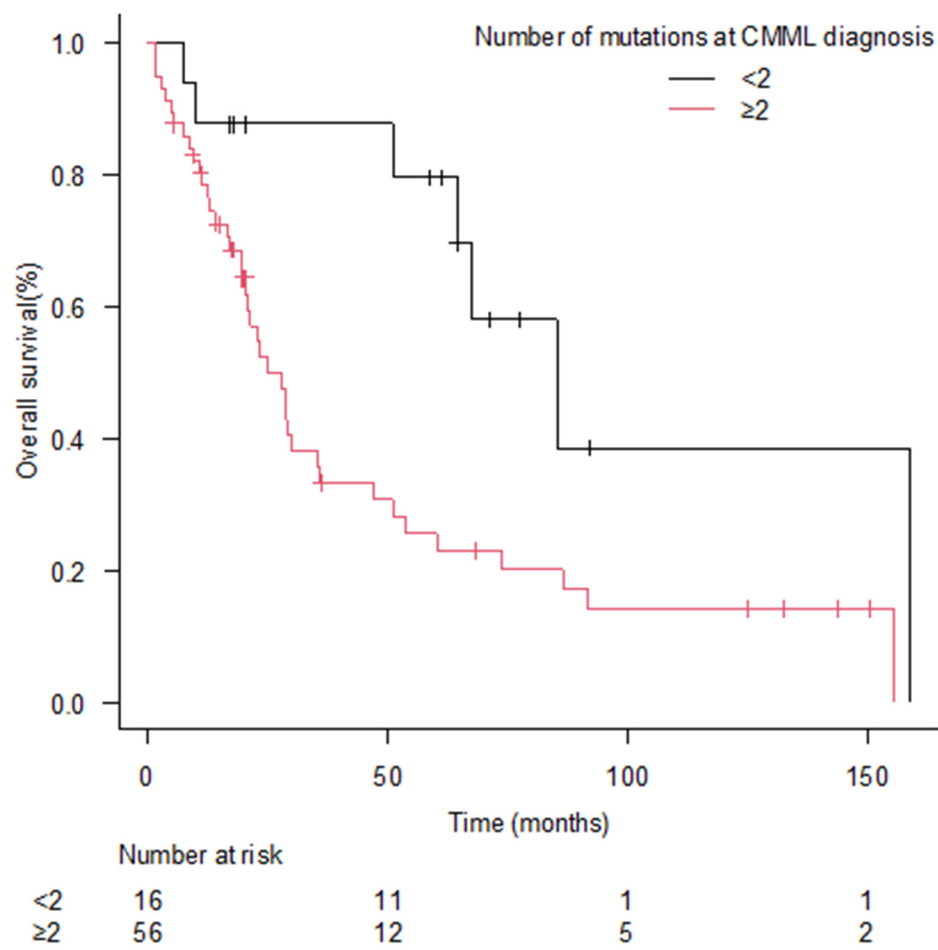

**Figure S2:** Overall survival according to the number of mutations detected at CMMML diagnosis.

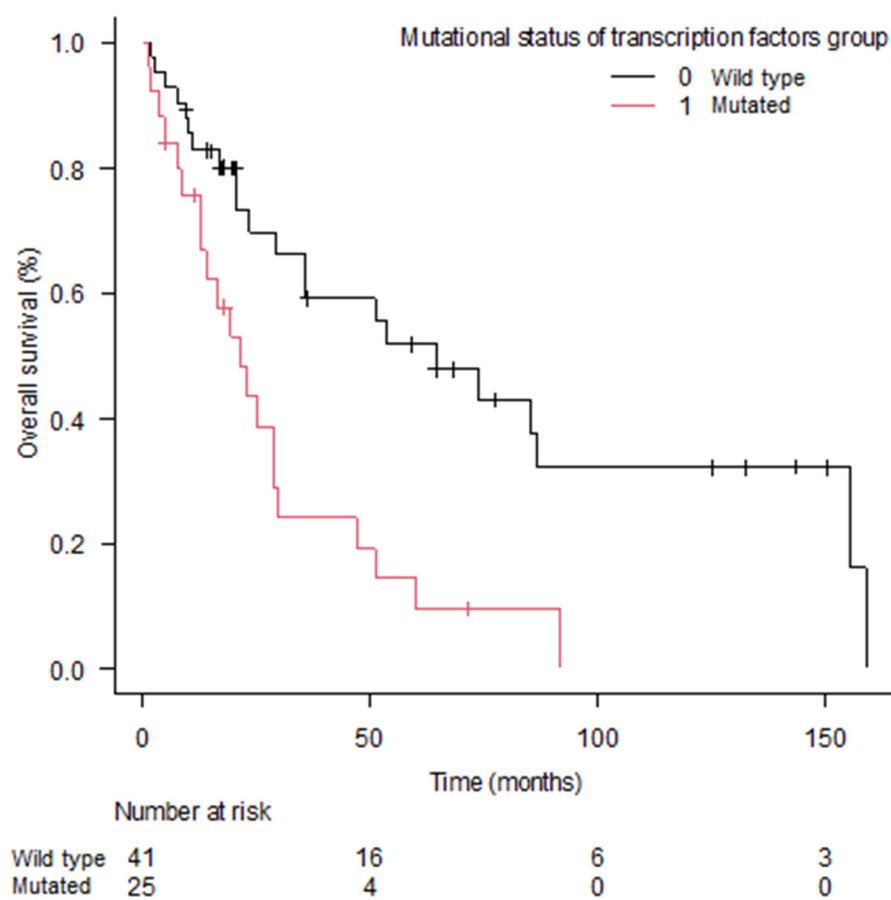

**Figure S3:** Overall survival according to the mutation status of transcription factors.
